# Supplementary material for: Proactive and Integrated Management and Empowerment in Parkinson’s Disease: Designing a New Model of Care
Source: Hindawi journal article supplement (doi:10.1155/2020/8673087), 2020-03-30
Supplement: f1 [file 8673087.f1.pdf]

Figure S1: a summary of the full logic model for the PRIME-Parkinson intervention.

| Challenges                                                                                                                                                                                                                                                                                                                                                                                                                                                              | Strategies                                                         | Activities                                                                                                                                                                                                                                                                                                                                                                                                                                                                                                                                                                                                                                                                                      |
|-------------------------------------------------------------------------------------------------------------------------------------------------------------------------------------------------------------------------------------------------------------------------------------------------------------------------------------------------------------------------------------------------------------------------------------------------------------------------|--------------------------------------------------------------------|-------------------------------------------------------------------------------------------------------------------------------------------------------------------------------------------------------------------------------------------------------------------------------------------------------------------------------------------------------------------------------------------------------------------------------------------------------------------------------------------------------------------------------------------------------------------------------------------------------------------------------------------------------------------------------------------------|
| <p>1. Deliver integrated care and continuity of care</p> <p>2. Manage issues early and proactively</p> <p>3. Access to specialised healthcare professionals</p> <p>4. Educate and empower patients and carers</p> <p>5. Organise care close to home</p> <p>6. Deliver personalised care and “precision” medicine</p>                                                                                                                                                    | <p><b>I. Personalised care management</b></p>                      | <ul style="list-style-type: none"> <li>- Agree how members of the multidisciplinary team can contribute to a care management approach and who is leading on this for each patient.</li> <li>- Develop and implement educational modules regarding roles and responsibilities, treatment options and tools for healthcare professionals and patients.</li> <li>- Support professionals involved in care management to coordinate care and empower patients.</li> <li>- Proactively target patients at highest risk of admission.</li> <li>- Support care managers to deliver care at home or in care homes.</li> <li>- Develop IT infrastructure to support care managers.</li> </ul>            |
|                                                                                                                                                                                                                                                                                                                                                                                                                                                                         | <p><b>II: Education and empowerment of patients and carers</b></p> | <ul style="list-style-type: none"> <li>- Detect the gaps in patients’ and carers’ education and empowerment.</li> <li>- Develop and implement written / e-learning regarding the <u>big six symptoms</u><sup>1</sup>.</li> <li>- Direct patients and carers towards the most relevant information for them, based on their disease stage, priorities, health skills and symptom burden.</li> <li>- Facilitate peer support groups for patients and carers.</li> <li>- Educate patients and carers regarding self-monitoring and self-management and provide tools to support this.</li> <li>- Develop IT infrastructure to support patients.</li> </ul>                                         |
|                                                                                                                                                                                                                                                                                                                                                                                                                                                                         | <p><b>III. Empowerment of healthcare professionals</b></p>         | <ul style="list-style-type: none"> <li>- Provide an overview of care network for each individual patient.</li> <li>- Detect regional gaps and make consortium agreements and create networks.</li> <li>- Develop and implement written / e-learning, regarding the <u>big six symptoms</u><sup>1</sup>.</li> <li>- Support professionals to develop Parkinson’s-specific expertise and the skills to support patients to self-manage.</li> <li>- Facilitate multidisciplinary team meetings for discussion of complex cases.</li> <li>- Facilitate continuous learning environment and augmented training.</li> <li>- Develop IT infrastructure to support healthcare professionals.</li> </ul> |
| <p><sup>1</sup> <b>‘Big six symptoms’</b>: a focus on reducing/preventing the following issues:</p> <ul style="list-style-type: none"> <li>- falls and resulting fractures</li> <li>- urinary tract infection</li> <li>- neuropsychiatric disorders including delirium, hallucinations, and psychosis</li> <li>- mood disorders and anxiety (including depression)</li> <li>- pneumonia caused by swallowing issues</li> <li>- social and functional decline</li> </ul> | <p><b>IV. Population health approach</b></p>                       | <ul style="list-style-type: none"> <li>- Identify all stakeholders for each region.</li> <li>- Reach consensus regarding roles and responsibilities of each of the stakeholders and the treatment options.</li> <li>- Develop and agree to regional multidisciplinary team protocols.</li> <li>- Sign regional agreements regarding the vision of care, the roles and responsibilities, and the treatment options with multidisciplinary team protocols.</li> </ul>                                                                                                                                                                                                                             |
|                                                                                                                                                                                                                                                                                                                                                                                                                                                                         | <p><b>V: Patient and professional friendly technology</b></p>      | <ul style="list-style-type: none"> <li>- Facilitate safe documentation of multidisciplinary team input and plans for follow-up.</li> <li>- Create a platform to facilitate communication and collaboration between the multidisciplinary team.</li> <li>- Provide infrastructure <ul style="list-style-type: none"> <li>* to support peer-to-peer contact or multidisciplinary team-consultation.</li> <li>* to create a continuous learning environment for patients and healthcare professionals.</li> <li>* for video-consultations, where relevant.</li> </ul> </li> <li>- Develop home-based self-monitoring IT tools.</li> <li>- Provide helpline/single point of access.</li> </ul>      |
